# Supplementary material
Source: Springer Nature journal article supplement (https://www.springermedizin.de/resource/supplementary/12913_2010_1491_MOESM1_ESM.pdf/9528274)
Supplement: MOESM1 [file 9528274]

1. Residents of study area
2. Enrolled in Citizen's Health Insurance
3. Newly certified as being eligible for LTCI benefits between April 1, 2000 and February 29, 2008
4. Not received long-term care services prior to April 1, 2000

1,020 satisfy the above 4 conditions

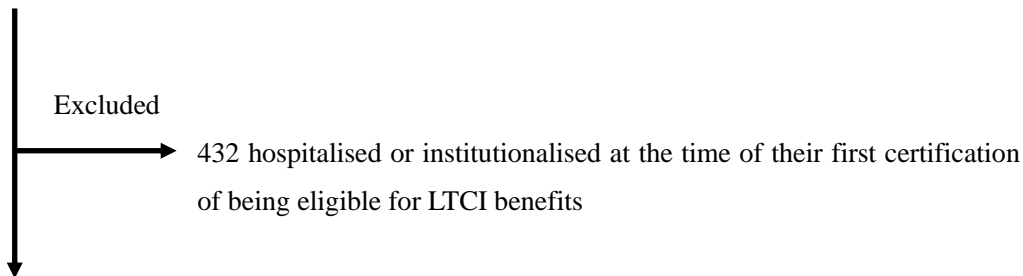

588 not hospitalised or institutionalised at the time of their first certification of being eligible for LTCI benefits

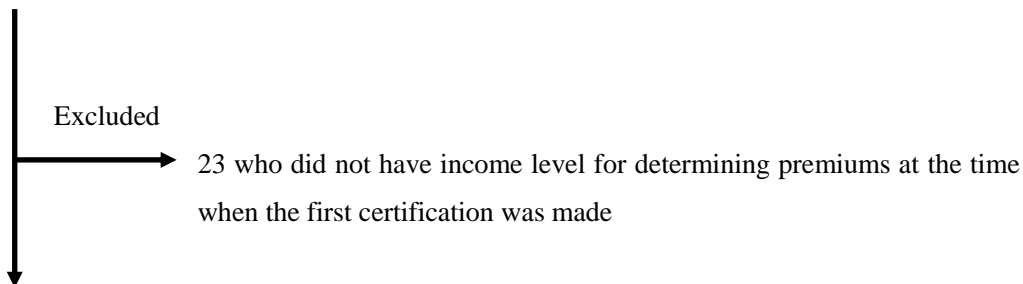

565 individuals analysed
